# Supplementary material
Source: PubMed Central journal article supplement (PMC7687034)
Supplement: JCB900097_Supplemental_Figure.pdf [file JCB900097_Supplemental_Figure.pdf]

## SUPPLEMENTARY FILES

|                                              | Series 1                                  | Series 2                                                     |
|----------------------------------------------|-------------------------------------------|--------------------------------------------------------------|
| <b>Number of animals in different groups</b> | Control (n=7)<br>Microglia depleted (n=6) | Control (n=7)<br>Microglia depleted (n=6)<br>P2Y12R KO (n=7) |
| <b>SD induction</b>                          | Subdural constant current stimulation     | Topical application of 1M KCl solution                       |
| <b>Monitored physiological variables</b>     | DC potential,<br>Electric threshold of SD | DC potential, $[K^+]_e$                                      |
| <b>Histology</b>                             | Iba1, P2Y12R, ICAM-1,<br>CD45 IF          | Iba1, P2Y12R, Kv2.1, c-fos,<br>GFAP, GS IF                   |

Table 1. Composition and set of experiments related to Experimental Procedures. Animal numbers represent mice included in the analysis. Abbreviations: P2Y12R: P2Y12 receptor; P2Y12R KO, P2Y12R knock out; SD, spreading depolarization; DC, direct current; CBF, cerebral blood flow,  $[K^+]_e$ , extracellular potassium ion concentration; IF, immunofluorescence; Iba1, ionized calcium-binding adaptor molecule 1; Kv2.1, voltage-gated potassium ion channel 2.1; GFAP, glial fibrillary acidic protein; GS, glutamine synthetase.

## KEY RESOURCES TABLE

| REAGENT or RESOURCE                    | SOURCE                     | IDENTIFIER               |
|----------------------------------------|----------------------------|--------------------------|
| <b>Antibodies</b>                      |                            |                          |
| P2Y12R                                 | AnaSpec                    | 55043A                   |
| c-fos                                  | Santa Cruz Biotechnology   | sc-52                    |
| c-fos                                  | Synaptic Systems           | 226 004                  |
| Kv2.1 clone K89/34                     | NeuroMab                   | 75-014                   |
| Iba-1                                  | Wako Chemicals             | 019-19741                |
| Iba-1                                  | Novusbio                   | NB100-1028               |
| GFAP                                   | Synaptic Systems           | 173 006                  |
| Glutamine synthetase                   | Synaptic Systems           | 367 005                  |
| ICAM-1                                 | R&D Systems                | AF796                    |
| CD45                                   | Bio-Rad                    | MCA1388                  |
| donkey anti-rabbit Alexa 488           | Jackson ImmunoResearch     | 711-546-152              |
| donkey anti-mouse Alexa 488            | Jackson ImmunoResearch     | 715-006-151              |
| donkey anti-chicken Alexa 488          | Jackson ImmunoResearch     | 703-546-155              |
| donkey anti-goat Alexa 488             | Jackson ImmunoResearch     | 705-546-147              |
| donkey anti-rabbit Alexa 647           | Jackson ImmunoResearch     | 711-605-152              |
| donkey anti-mouse Alexa 647            | Jackson ImmunoResearch     | 715-605-150              |
| donkey anti-guinea pig Alexa 647       | Jackson ImmunoResearch     | 706-606-148              |
| donkey anti-rat Alexa 647              | Jackson ImmunoResearch     | 712-606-153              |
| donkey anti-rabbit Alexa 594           | Invitrogen                 | A21207                   |
| donkey anti-mouse Alexa 594            | Jackson ImmunoResearch     | 715-586-151              |
| donkey anti-rabbit CF568               | Biotium                    | 20098-1mg                |
| <b>Chemicals</b>                       |                            |                          |
| PLX5622 CSF1R inhibitor                | Plexxikon Inc.             | Available only under MTA |
| CP-Isflurane                           | HÓD Állatgyógyászati KFT   | N/A                      |
| Chlorale hydrate                       | Sigma-Aldrich/Merck        | Cat#C8383                |
| Atropine solution (1mg/ml)             | Sigma-Aldrich/Merck        | Cat#A-046                |
| Potassium ionophore I - cocktail A     | Sigma-Aldrich/Merck        | Cat#99311                |
| Phosphate Buffered Saline              | Sigma-Aldrich/Merck        | Cat#P3813                |
| Sodium azide                           | Sigma-Aldrich/Merck        | Cat#S2002                |
| HEPES buffer                           | VWR                        | Cat#441485H              |
| Formaldehyde solution 4%               | MOLAR CHEMICALS KFT        | Cat#37308-006-410        |
| Glutardialdehyde 25%                   | MOLAR CHEMICALS KFT        | Cat#20240-301-340        |
| Sodium-acetate 3-hydrate               | MOLAR CHEMICALS KFT        | Cat#06971-101-170        |
| Borax, Sodium tetraborate 10-hydrate   | MOLAR CHEMICALS KFT        | Cat#07470-101-190        |
| Boric acid powder                      | MOLAR CHEMICALS KFT        | Cat#01670-101-170        |
| Experimental Models: Organisms/Strains |                            |                          |
| Mouse: C57BL/6J                        | The Jackson Laboratory     | stock no: 000664         |
| Mouse: P2RY12 KO (genotype: -/-)       | Taconic Bioscience         | Model#TF1881             |
| <b>Software and Algorithms</b>         |                            |                          |
| MATLAB                                 | MathWorks                  | RRID: SCR_001622         |
| SPSS                                   | IBM Corporation            | RRID: SCR_002865         |
| ACQKNOWLEDGE                           | BIOPAC Systems             | RRID: SCR_014279         |
| SigmaPlot                              | Systat Software            | RRID: SCR_003210         |
| GraphPadPrism 7                        | GraphPad Software Inc.     | RRID: SCR_002798         |
| ImageJ                                 | NIH                        | RRID: SCR_002285         |
| NIS Elements AR 4.50.00                | Nikon Instruments          | RRID: SCR_014329         |
| VividSTORM                             | doi:10.1038/nprot.2016.002 |                          |
| <b>Other</b>                           |                            |                          |
| AIN-76A 1/2" Food Pellets              | Research Diets             | D10001                   |
